# Supplementary material
Source: PubMed Central journal article supplement (PMC8857699)

Online supplement: Flow diagram describing selection of studies.

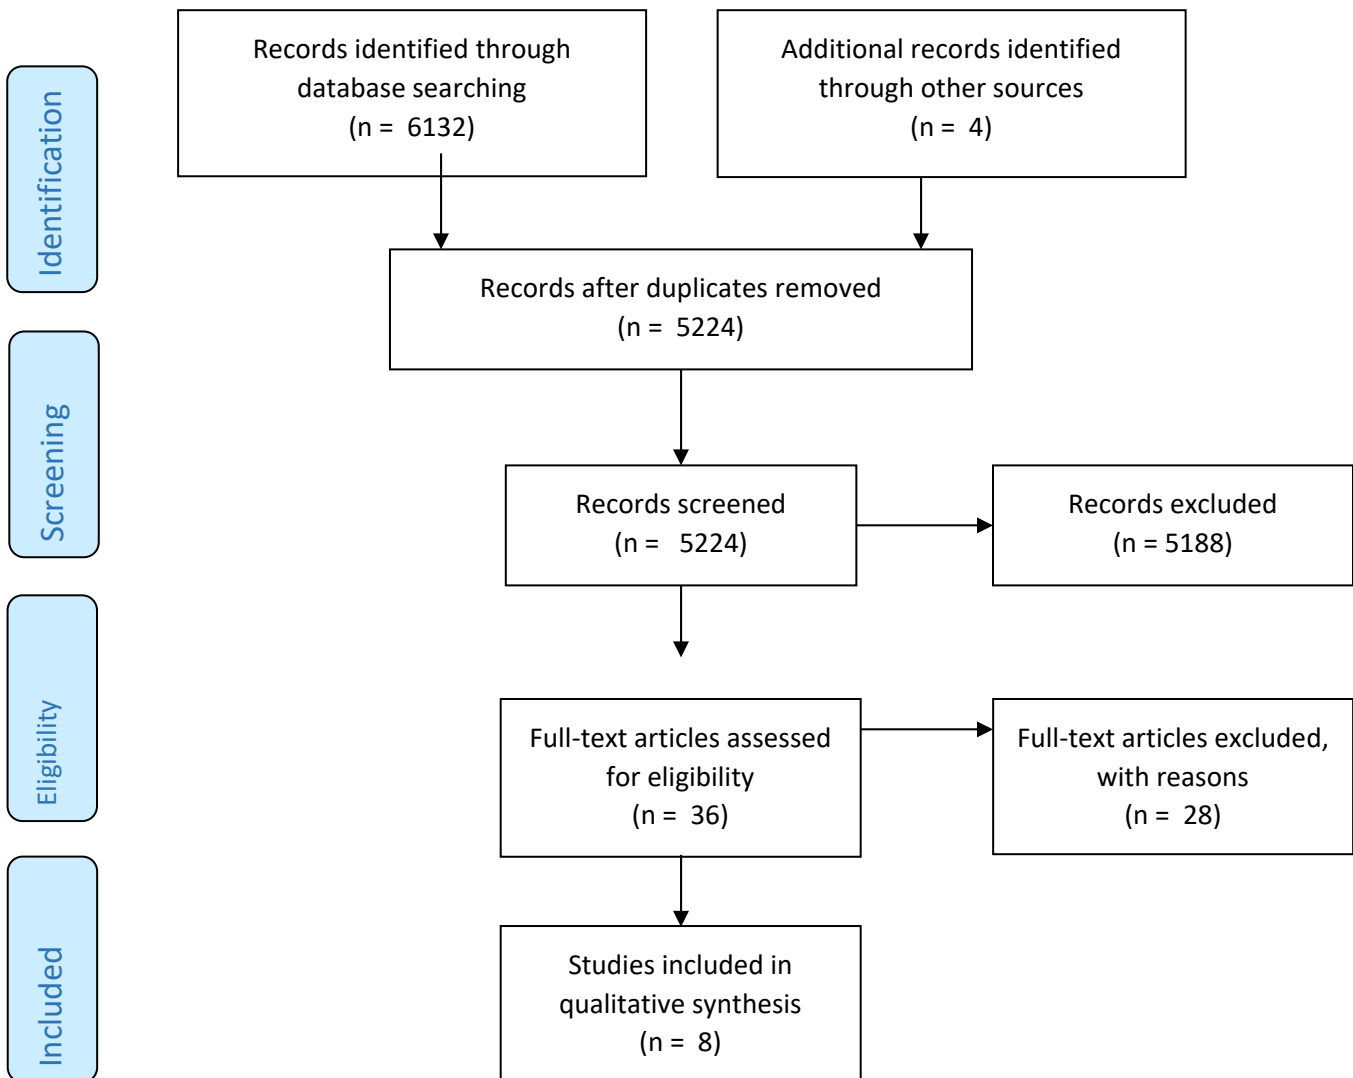

Supplement: NIHMS1772932-supplement-online_supplement.pdf [file NIHMS1772932-supplement-online_supplement.pdf]
